# Supplementary material
Source: publisher figshare collection journal article supplement (https://diabetesjournals.figshare.com/articles/dataset/_/13122956)
Supplement: Supplementary file 1 [file 2]

**Supplement Table 1.** Clinical characteristics of diabetic patients before and after 6 months of Dapagliflozin treatment

|                                   | Baseline (n = 54) | After Dapagliflozin (n = 54) | p-value      |
|-----------------------------------|-------------------|------------------------------|--------------|
| Age (years)                       | 61.8±7.7          | -                            |              |
| Male (%)                          | 38 (70.3)         | -                            |              |
| Body height (cm)                  | 164.5±8.2         | -                            |              |
| Body weight (kg)                  | 73.4±11           | 70.4±10.1                    | 0.35         |
| BMI (kg/M <sup>2</sup> )          | 27.1±3.3          | 26±2.9                       | 0.26         |
| Waist (cm)                        | 96.4±8.3          | 91.5±6.7                     | <b>0.04</b>  |
| Hypertension                      | 48(88.8)          | -                            |              |
| Systolic blood pressure (mmHg)    | 131.2±14.2        | 128±18.7                     | 0.96         |
| Diastolic blood pressure (mmHg)   | 76.5±8.7          | 72.4±10.5                    | 0.88         |
| Hyperlipidemia                    | 44(81.4)          | -                            |              |
| Preprandial serum glucose (mg/dl) | 157.7±35          | 123.5±15.5                   | 0.12         |
| HbA1c (%;mmol/mol)                | 8.1±1.2; 64±10.2  | 7±0.8; 53±9.8                | <b>0.003</b> |
| eGFR (ml/min)                     | 73.3±24.6         | 74.8±31.4                    | 0.24         |
| Triglyceride (mg/dL)              | 160.8±81.6        | 148.2±92.4                   | 0.12         |
| Cholesterol (mg/dl)               | 189.1±42.8        | 171.2±34.6                   | 0.38         |
| LDL                               | 108.9±34.1.       | 90.9±27.9.                   | 0.51         |
| Medications                       |                   |                              |              |
| ACEI/ARB, N (%)                   | 41 (76)           | -                            |              |
| B-blocker, N (%)                  | 26 (54.1)         | -                            |              |
| CCB, N (%)                        | 10 (18.5)         | -                            |              |
| Metformin, N (%)                  | 43 (79.6)         | -                            |              |
| TZD, N (%)                        | 3 (5.5)           | -                            |              |
| DDP4, N (%)                       | 27 (50)           | -                            |              |
| Sulfonylureas, N (%)              | 19 (35.2)         | -                            |              |
| Statins, N (%)                    | 42 (77.7)         | -                            |              |

Data are expressed as mean ± standard deviation or median (interquartile range). **Bold values** indicate significance. BMI =body mass index; HbA1c = hemoglobin A1c; eGFR= estimated Glomerular filtration rate; LDL= low-density lipoprotein; ACEI/ARB= angiotensin- converting enzyme inhibitors/ angiotensin receptor blockers; CCB= calcium channel blocker; TZD= Thiazolidinedione; DDP4= dipeptidyl peptidase-4 inhibitors
