# Supplementary material
Source: publisher figshare collection journal article supplement (https://diabetesjournals.figshare.com/articles/dataset/_/13122956)
Supplement: Supplementary file 3 [file 2]

**Table 2.** Conventional and speckle-tracking echocardiographic parameters of diabetic patients before and after 6 months of Dapagliflozin treatment

|                               | <b>Baseline (n = 52)</b> | <b>After Dapagliflozin (n = 52)</b> | <b>p-value</b> |
|-------------------------------|--------------------------|-------------------------------------|----------------|
| <b>LVMI (g/m<sup>2</sup>)</b> | 90.6±39.6                | 88.6±22.8                           | 0.86           |
| <b>LVEDV (ml)</b>             | 68±30.1                  | 58.8±18.8                           | 0.32           |
| <b>LVESV (ml)</b>             | 22.4±14.4                | 19.5±9.6                            | 0.5            |
| <b>LVEF (%)</b>               | 67.6±7.2                 | 68.6±8.4                            | 0.71           |
| <b>E (cm/s)</b>               | 78.1±24.2                | 72.1±22.8                           | 0.45           |
| <b>E/A</b>                    | 0.8±0.2                  | 0.9±0.4                             | 0.44           |
| <b>e' (cm/s)</b>              | 7.5±2                    | 10.2±2.6                            | <b>0.001</b>   |
| <b>E/e'</b>                   | 11±4.7                   | 7.1±2.3                             | <b>0.007</b>   |
| <b>GLS (%)</b>                | -14.8±5.2                | -19.2±3.7                           | <b>0.001</b>   |

Data are expressed as mean ± standard deviation. **Bold values** indicate significance. LVMI = left ventricular mass index; LVIDd = left ventricular interior dimension at end diastole; LVEF = left ventricular ejection fraction; IVRT = isovolumic relaxation time; DT = deceleration time; E/A = transmitral valve E to A velocity ratio; E/e' = mitral early filling velocity to early diastolic mitral annular velocity ratio; GLS = peak systolic global longitudinal strain
